# Supplementary material
Source: MDPI journal article supplement (https://www.mdpi.com/2073-445X/10/12/1384)
Supplement: s1 [file s1]

## Supplementary Materials: Confusion Matrix

| XGB                 |                  | Reference |            |                  |                 |       | $A_m$ [ha] | $W_h$     | User's Accuracy |
|---------------------|------------------|-----------|------------|------------------|-----------------|-------|------------|-----------|-----------------|
| Map                 | Class            | Once/year | Twice/year | Three times/year | Four times/year | Total |            |           |                 |
|                     | Once/year        | 7         | 2          | 1                | 0               | 10    | 3,701      | 0,003     | 0,7             |
|                     | Twice/year       | 0         | 40         | 1                | 0               | 41    | 654,059    | 0,544     | 0,98            |
|                     | Three times/year | 0         | 2          | 26               | 0               | 28    | 536,376    | 0,446     | 0,93            |
|                     | Four times/year  | 0         | 0          | 6                | 9               | 15    | 7,541      | 0,006     | 0,6             |
| Total               |                  | 7         | 44         | 34               | 9               | 94    | 1201,678   | 1         |                 |
| Map                 | Class            | Once/year | Twice/year | Three times/year | Four times/year | Total | $A_m$ [ha] | $W_h$     |                 |
|                     | Once/year        | 0,002     | 0,001      | 0,0003           | 0               | 0,003 | 0,003      | 2,497E-06 |                 |
|                     | Twice/year       | 0         | 0,531      | 0,013            | 0               | 0,544 | 0,012      | 1,024E-05 |                 |
|                     | Three times/year | 0         | 0,032      | 0,414            | 0               | 0,446 | 0,008      | 6,990E-06 |                 |
|                     | Four times/year  | 0         | 0          | 0,003            | 0,004           | 0,006 | 0,005      | 3,745E-06 |                 |
| Total               |                  | 0,002     | 0,564      | 0,431            | 0,004           | 1     | 0,028      | 2,347E-05 |                 |
| Producer's Accuracy |                  | 1         | 0,94       | 0,96             | 1               |       |            |           |                 |
| Overall Accuracy    |                  | 0,95      |            |                  |                 |       |            |           |                 |
| Area estimates      |                  | 2,591     | 677,159    | 517,403          | 4,525           |       |            |           |                 |

## RF

| Map | Class            | Reference |            |                  |                 | Total | $A_m$ [ha] | $W_h$  | User's Accuracy |
|-----|------------------|-----------|------------|------------------|-----------------|-------|------------|--------|-----------------|
|     |                  | Once/year | Twice/year | Three times/year | Four times/year |       |            |        |                 |
| Map | Once/year        | 7         | 3          | 0                | 0               | 10    | 0,144      | 0,0001 | 0,7             |
|     | Twice/year       | 0         | 41         | 0                | 0               | 41    | 653,157    | 0,558  | 1               |
|     | Three times/year | 0         | 5          | 23               | 0               | 28    | 516,437    | 0,441  | 0,82            |
|     | Four times/year  | 0         | 0          | 6                | 9               | 15    | 0,261      | 0,0002 | 0,6             |
|     | Total            | 7         | 49         | 29               | 9               | 94    | 1169,999   |        |                 |

| Map                 | Class            | Reference |            |                  |                 | Total  | $A_m$ [ha] | $W_h$       |
|---------------------|------------------|-----------|------------|------------------|-----------------|--------|------------|-------------|
|                     |                  | Once/year | Twice/year | Three times/year | Four times/year |        |            |             |
|                     | Once/year        | 8,59E-05  | 3,68E-05   | 0                | 0               | 0,0001 | 0,003      | 2,56411E-06 |
|                     | Twice/year       | 0         | 0,558      | 0                | 0               | 0,558  | 0,012      | 1,05128E-05 |
|                     | Three times/year | 0         | 0,079      | 0,363            | 0               | 0,441  | 0,008      | 7,17949E-06 |
|                     | Four times/year  | 0         | 0          | 8,92E-05         | 0,00013         | 0,000  | 0,005      | 3,84616E-06 |
|                     | Total            | 8,59E-05  | 0,637      | 0,363            | 0,00013         | 1      | 0,028      | 2,41026E-05 |
| Producer's Accuracy |                  | 1         | 0,88       | 0,9998           | 1               |        |            |             |
| Overall Accuracy    |                  | 0,92      |            |                  |                 |        |            |             |
| Area estimates      |                  | 0,1005    | 745,421    | 424,321          | 0,157           |        |            |             |

## TWDTW

| Map | Class            | Reference |            |                  |                 | Total | $A_m$ [ha] | $W_h$ | User's Accuracy |
|-----|------------------|-----------|------------|------------------|-----------------|-------|------------|-------|-----------------|
|     |                  | Once/year | Twice/year | Three times/year | Four times/year |       |            |       |                 |
| Map | Once/year        | 7         | 3          | 0                | 0               | 10    | 370,594    | 0,231 | 0,7             |
|     | Twice/year       | 0         | 36         | 5                | 0               | 41    | 244,664    | 0,153 | 0,88            |
|     | Three times/year | 0         | 3          | 25               | 0               | 28    | 771,670    | 0,481 | 0,89            |
|     | Four times/year  | 0         | 0          | 6                | 9               | 15    | 215,755    | 0,135 | 0,6             |
|     | Total            | 7         | 42         | 36               | 9               | 94    | 1602,683   |       |                 |

| Map | Class               | Reference |             |                  |                 |       | $A_m$ [ha] | $W_h$       |
|-----|---------------------|-----------|-------------|------------------|-----------------|-------|------------|-------------|
|     |                     | Once/year | Twice/year  | Three times/year | Four times/year | Total |            |             |
|     | Once/year           | 0,162     | 0,069       | 0                | 0               | 0,231 | 0,003      | 1,87186E-06 |
|     | Twice/year          | 0         | 0,134       | 0,019            | 0               | 0,153 | 0,0123     | 7,67463E-06 |
|     | Three times/year    | 0         | 0,052       | 0,430            | 0               | 0,481 | 0,0084     | 5,24121E-06 |
|     | Four times/year     | 0         | 0           | 0,054            | 0,081           | 0,135 | 0,0045     | 2,80779E-06 |
|     | Total               | 0,162     | 0,254999699 | 0,502            | 0,081           | 1     | 0,0282     | 1,75955E-05 |
|     | Producer's Accuracy | 1         | 0,526       | 0,855751096      | 1               |       |            |             |
|     | Overall Accuracy    | 0,81      |             |                  |                 |       |            |             |
|     | Area estimates      | 259,416   | 408,684     | 805,130          | 129,453         |       |            |             |

| ET  |                     |             |             |                  |                 |             |            |             |                 |
|-----|---------------------|-------------|-------------|------------------|-----------------|-------------|------------|-------------|-----------------|
| Map | Class               | Reference   |             |                  |                 |             | $A_m$ [ha] | $W_h$       | User's Accuracy |
|     |                     | Once/year   | Twice/year  | Three times/year | Four times/year | Total       |            |             |                 |
|     | Once/year           | 7           | 3           | 0                | 0               | 10          | 0,095      | 8,10E-05    | 0,7             |
|     | Twice/year          | 0           | 39          | 2                | 0               | 41          | 825,199    | 0,701       | 0,95            |
|     | Three times/year    | 0           | 9           | 19               | 0               | 28          | 350,956    | 0,298       | 0,68            |
|     | Four times/year     | 0           | 0           | 6                | 9               | 15          | 0,142      | 0,000       | 0,6             |
|     | Total               | 7           | 51          | 27               | 9               | 94          | 1176,392   |             |                 |
| Map | Class               | Reference   |             |                  |                 |             | $A_m$ [ha] | $W_h$       |                 |
|     |                     | Once/year   | Twice/year  | Three times/year | Four times/year | Total       |            |             |                 |
|     | Once/year           | 5,67095E-05 | 2,43041E-05 | 0                | 0               | 8,10136E-05 | 0,003      | 2,55017E-06 |                 |
|     | Twice/year          | 0           | 0,667       | 0,034            | 0               | 0,701       | 0,0123     | 1,04557E-05 |                 |
|     | Three times/year    | 0           | 0,096       | 0,202            | 0               | 0,298       | 0,0084     | 7,14048E-06 |                 |
|     | Four times/year     | 0           | 0           | 4,83445E-05      | 7,25168E-05     | 0,0001      | 0,0045     | 3,82526E-06 |                 |
|     | Total               | 5,67095E-05 | 0,763       | 0,237            | 7,25168E-05     | 1           | 0,0282     | 2,39716E-05 |                 |
|     | Producer's Accuracy | 1           | 0,87        | 0,86             | 1               |             |            |             |                 |
|     | Overall Accuracy    | 0,87        |             |                  |                 |             |            |             |                 |
|     | Area estimates      | 0,067       | 897,781     | 278,459          | 0,085           |             |            |             |                 |
